# Supplementary material
Source: HighWire-hosted journal article supplement (https://erj.ersjournals.com/content/53/1/1801900)

a) Integrated right heart phenotyping

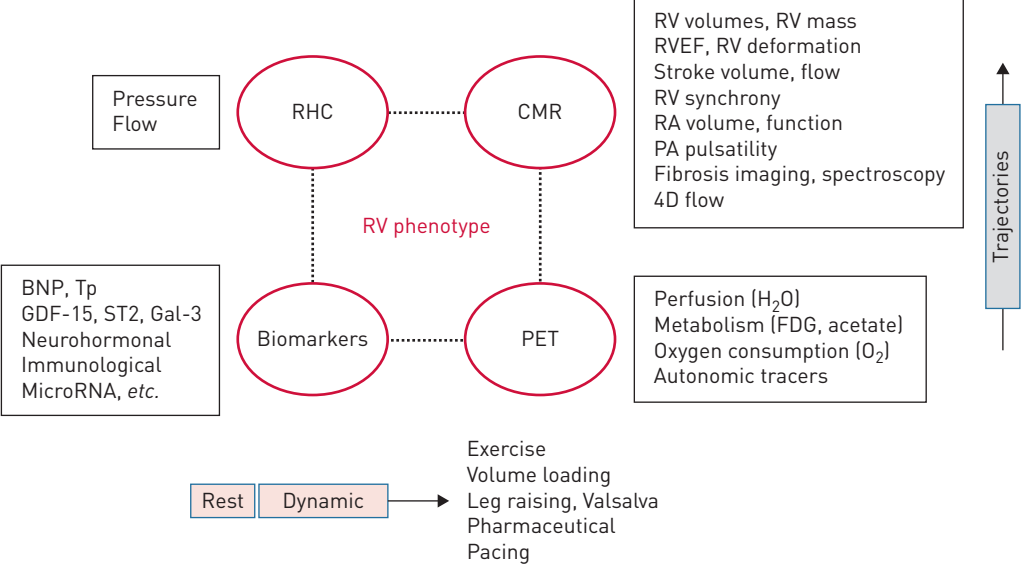

b) Future directions of research

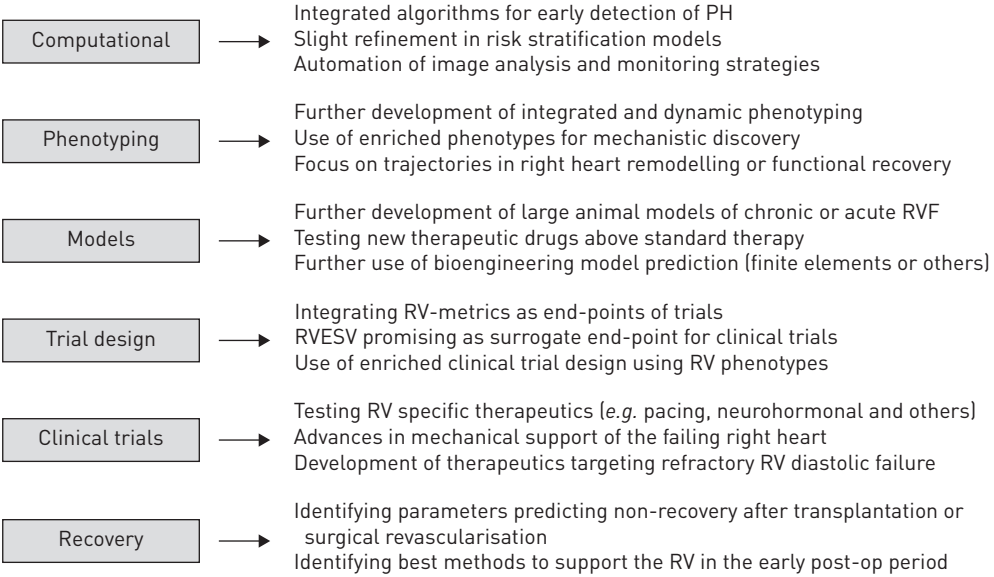

Supplement: inline-supplementary-material-1 [file inline-supplementary-material-1.pdf]
